# Supplementary material
Source: MDPI journal article supplement (https://www.mdpi.com/2673-4133/2/1/8)
Supplement: s1 [file s1]

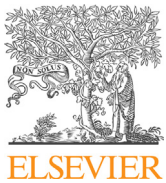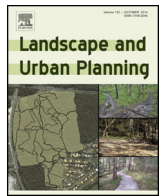

## Corrigendum

# Corrigendum to “Effects of urbanization on stream habitats and associated adult dragonfly and damselfly communities in central Brazilian Amazonia” [Landsc. Urban Plan. 127 (2014) 28–40]

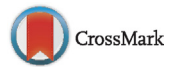C.S. Monteiro-Júnior<sup>a,b,\*</sup>, L. Juen<sup>b</sup>, N. Hamada<sup>a</sup><sup>a</sup> Coordenação de Biodiversidade, Instituto Nacional de Pesquisas da Amazônia (INPA), Av. André Araújo, 2936, Petrópolis, CEP 69067-375 Manaus, Amazonas, Brazil<sup>b</sup> Laboratório de Ecologia e Conservação, Universidade Federal do Pará, Instituto de Ciências Biológicas, Rua Augusto Correia, No. 1 Bairro Guama, CEP 66.075-110 Belém, Pará, Brazil

The author noticed an error in Table 1, item 7 on page 31. “Canopy cover (M)” should be changed to “Water flow in the channel (M)”. The corrected Table 1 can be found here.

**Table 1**  
Habitat characteristics used in evaluation of sampling sites for HII calculations.

|   | Characteristic                                             | Condition                                                                                                                                                                                                                                                                                                       | Score                      |
|---|------------------------------------------------------------|-----------------------------------------------------------------------------------------------------------------------------------------------------------------------------------------------------------------------------------------------------------------------------------------------------------------|----------------------------|
| 1 | Access (M)                                                 | Paved road.<br>Unpaved road.<br>Track.<br>Path.                                                                                                                                                                                                                                                                 | 0<br>1<br>2<br>3           |
| 2 | Width of the riparian forest                               | No woody riparian vegetation.<br>No riparian forest, but some shrubs.<br>Well-defined riparian forest, 1–5 m in width.<br>Well-defined riparian forest, 5–30 m in width.<br>Well-defined riparian forest, more than 30 m in width.<br>Riparian vegetation contiguous with surrounding forest.                   | 0<br>1<br>2<br>3<br>4<br>5 |
| 3 | Preservation of the riparian forest                        | Frequent gaps with some regrowth.<br>Gaps at intervals of 25 m to 50 m.<br>Gaps at intervals of more than 50 m.<br>Riparian forest intact.                                                                                                                                                                      | 0<br>1<br>2<br>3           |
| 4 | Condition of the riparian forest within 10 m of the stream | Grass with some shrubs.<br>Grass mixed with some pioneer trees and shrubs.<br>Regenerating habitat, with a predominance of pioneer species, secondary forest, and dense undergrowth.<br>Pioneer species mixed with mature trees.<br>More than 90% of the vegetation constituted by native or non-pioneer trees. | 0<br>1<br>2<br>3<br>4      |

DOI of original article: <http://dx.doi.org/10.1016/j.landurbplan.2014.03.006>.

\* Corresponding author. Current address: Laboratório de Ecologia e Conservação, Universidade Federal do Pará, Instituto de Ciências Biológicas, Rua Augusto Correia, No. 1 Bairro Guama, CEP 66.075-110 Belém, Pará, Brazil. Tel.: +55 91 3201 8896.

E-mail addresses: [csmonteirojr@gmail.com](mailto:csmonteirojr@gmail.com), [claudiomonteiro80@hotmail.com](mailto:claudiomonteiro80@hotmail.com) (C.S. Monteiro-Júnior), [leandrojuen@ufpa.br](mailto:leandrojuen@ufpa.br) (L. Juen), [nhamada@inpa.gov.br](mailto:nhamada@inpa.gov.br) (N. Hamada).

<http://dx.doi.org/10.1016/j.landurbplan.2014.07.009>

0169-2046/© 2014 Elsevier B.V. All rights reserved.

Table 1 (Continued)

|    | Characteristic                                                | Condition                                                                                                                                                | Score |
|----|---------------------------------------------------------------|----------------------------------------------------------------------------------------------------------------------------------------------------------|-------|
| 5  | Water retention mechanisms                                    | Retention by five or more of the following: plastic, metal, glass, rubber, building materials, organic matter.                                           | 0     |
|    |                                                               | Retention by three or more of the following: plastic, metal, glass, rubber, building materials, organic matter.                                          | 1     |
|    |                                                               | Retention by one or more of the following: plastic, metal, glass, rubber, building materials, organic matter.                                            | 2     |
|    |                                                               | Retention by leaves and trunks with no urban refuse.                                                                                                     | 3     |
| 6  | Channel structure (M)                                         | Width/depth ratio > 50.                                                                                                                                  | 0     |
|    |                                                               | Width/depth ratio 25–50.                                                                                                                                 | 1     |
|    |                                                               | Width/depth ratio 15–25.                                                                                                                                 | 2     |
|    |                                                               | Width/depth ratio 8–15.                                                                                                                                  | 3     |
|    |                                                               | Width/depth ratio < 7.                                                                                                                                   | 4     |
| 7  | Water flow in the channel (M)                                 | Little water in the channel, many pools                                                                                                                  | 0     |
|    |                                                               | 25–50% of available channel filled with water (50–75% exposed)                                                                                           | 1     |
|    |                                                               | 50–75% of available channel filled with water (25–50% exposed)                                                                                           | 2     |
|    |                                                               | >75% of available channel filled with water (<25 exposed)                                                                                                | 3     |
|    |                                                               | Water covering the bases of both banks                                                                                                                   | 4     |
| 8  | Canopy cover (M)                                              | Open – 0% to 10%.                                                                                                                                        | 0     |
|    |                                                               | Partly open – 11% to 40%.                                                                                                                                | 1     |
|    |                                                               | Intermediate – 41% to 60%.                                                                                                                               | 2     |
|    |                                                               | Partly closed – 61% to 90%.                                                                                                                              | 3     |
|    |                                                               | Closed – 91% to 100%.                                                                                                                                    | 4     |
| 9  | Absence of human occupation (M)                               | Urban or industrial development on the stream bank                                                                                                       | 0     |
|    |                                                               | Urban or industrial development at a distance of more than 15 m from the edge of the stream                                                              | 1     |
|    |                                                               | Urban or industrial development at a distance of more than 25 m from the edge of the stream                                                              | 2     |
|    |                                                               | Urban or industrial development at a distance of more than 50 m from the edge of the stream                                                              | 3     |
|    |                                                               | No urban or industrial development                                                                                                                       | 4     |
| 10 | Absence of domestic or industrial effluents (M)               | Domestic or industrial effluents discharged directly into the stream                                                                                     | 0     |
|    |                                                               | Urban development without adequate public sanitation, with waste being discharged near or into the stream                                                | 1     |
|    |                                                               | Urban or industrial development connected to public sanitation network and treatment stations                                                            | 2     |
|    |                                                               | No buildings or effluent discharge                                                                                                                       | 3     |
| 11 | Absence of building density (within 100 m) (M)                | More than 100 buildings.                                                                                                                                 | 0     |
|    |                                                               | Between 51 and 100 buildings.                                                                                                                            | 1     |
|    |                                                               | Between 11 and 50 buildings.                                                                                                                             | 2     |
|    |                                                               | Between 1 and 10 buildings.                                                                                                                              | 3     |
|    |                                                               | No buildings.                                                                                                                                            | 4     |
| 12 | Absence of dumped trash (inside or outside of the stream) (M) | Five or more of the following: plastic, metal, glass, rubber, building materials, organic matter.                                                        | 0     |
|    |                                                               | At least three of the following: plastic, metal, glass, rubber, building materials, organic matter.                                                      | 1     |
|    |                                                               | At least one of the following: plastic, metal, glass, rubber, building materials, organic matter (principally leaves and woody material with sediments). | 2     |
|    |                                                               | Organic waste only.                                                                                                                                      | 3     |
|    |                                                               | No evidence.                                                                                                                                             | 4     |
